# Supplementary material for: Quantitative trait loci mapping for canine hip dysplasia and its related traits in UK Labrador Retrievers
Source: PubMed Central journal article supplement (PMC4190382; doi:10.1186/1471-2164-15-833), 2014-10-01

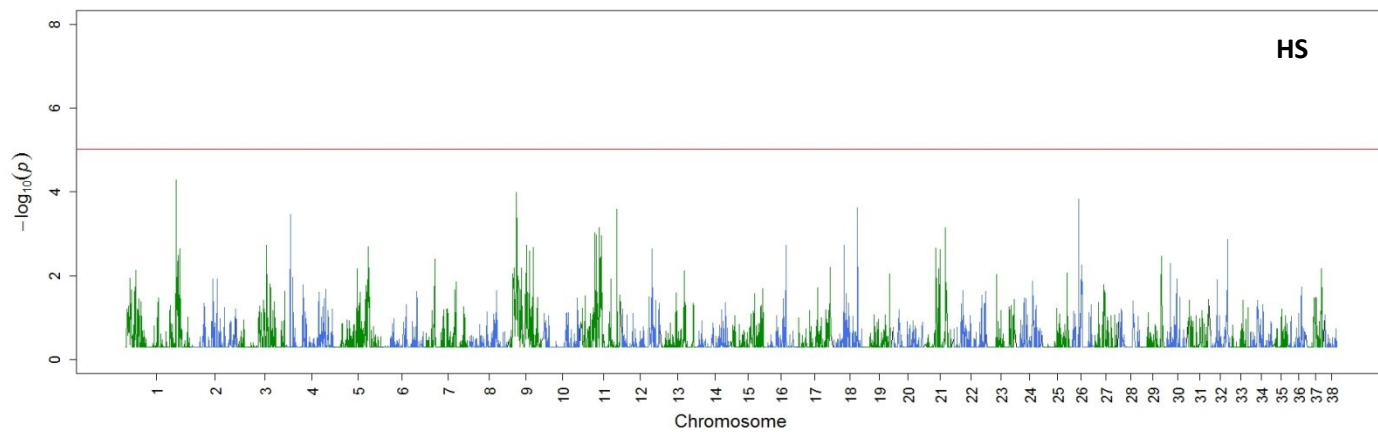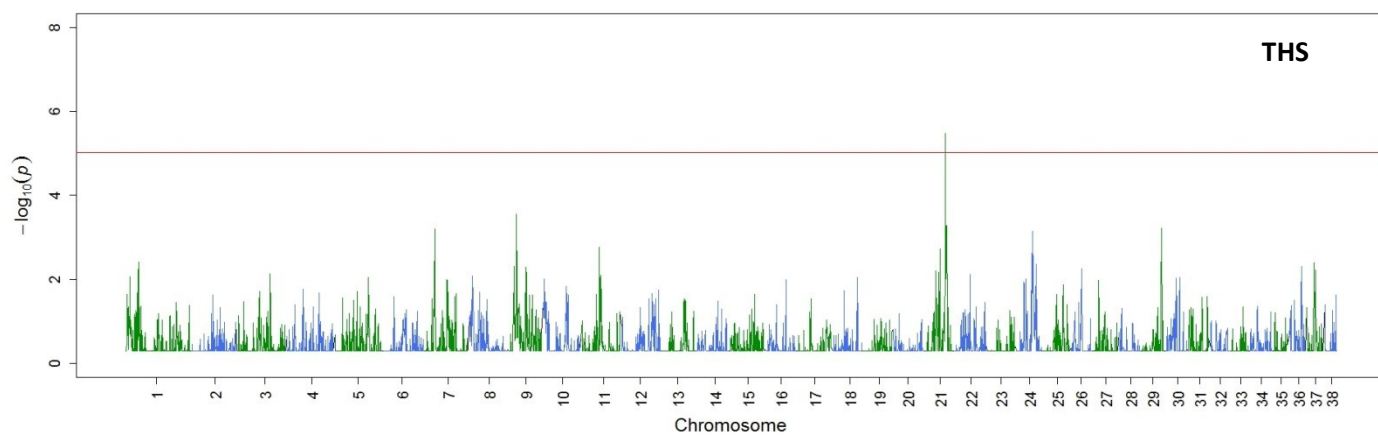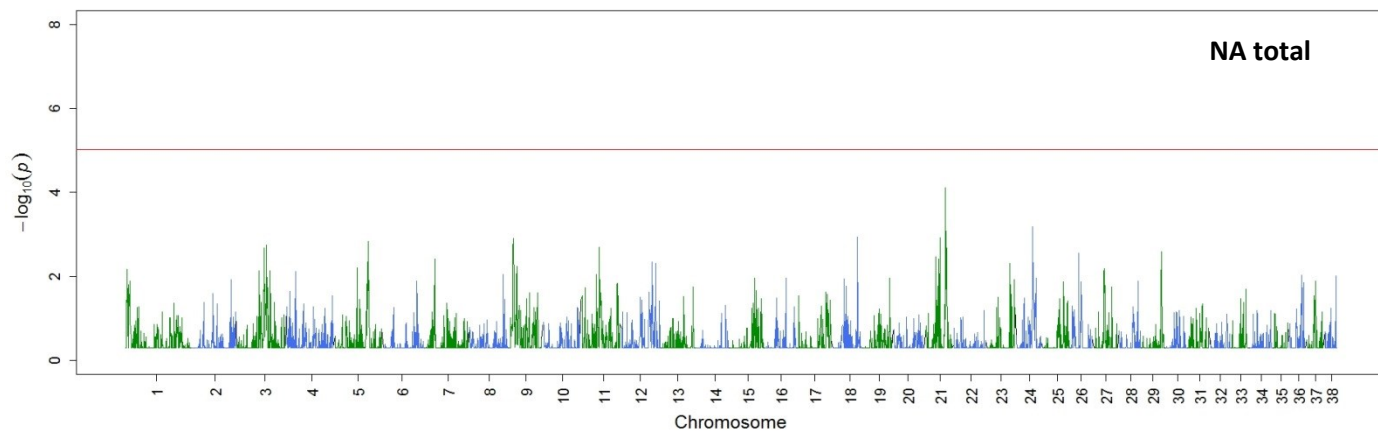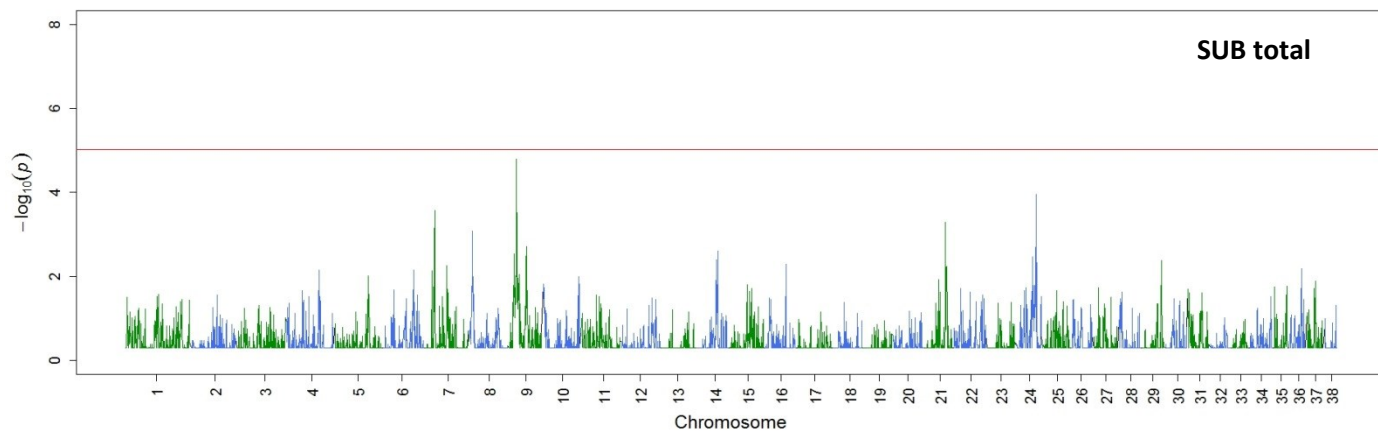

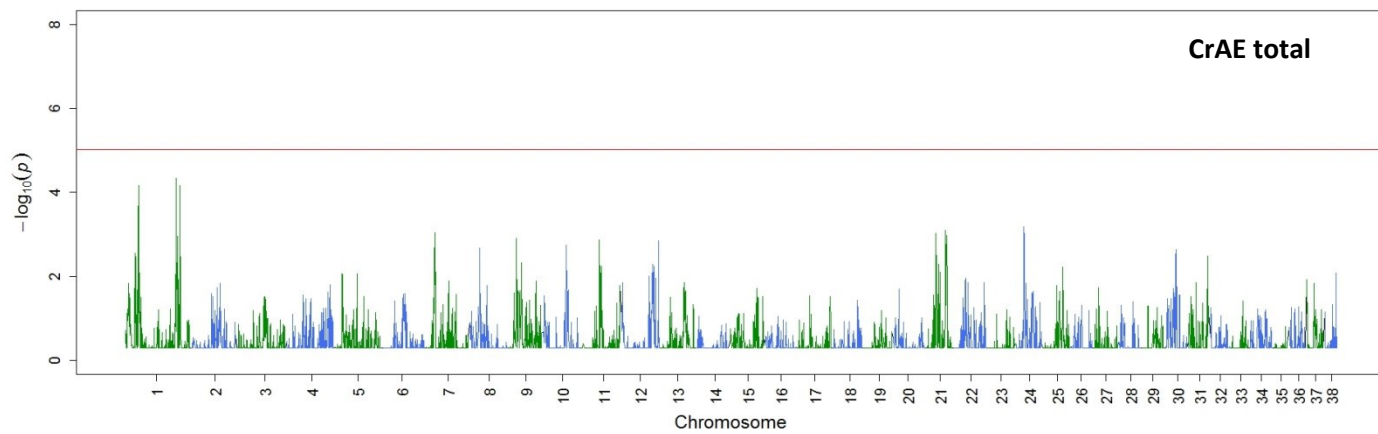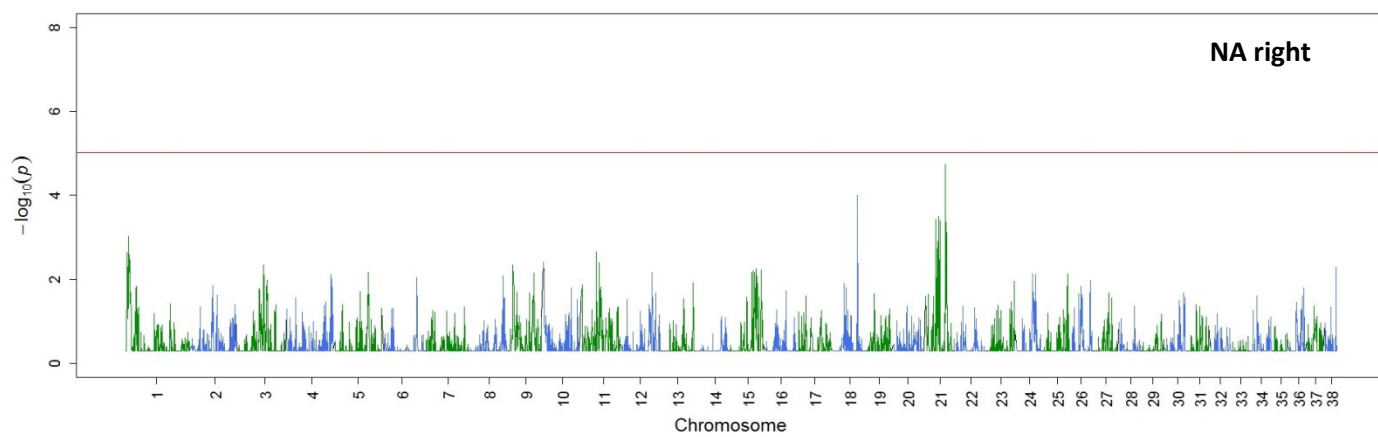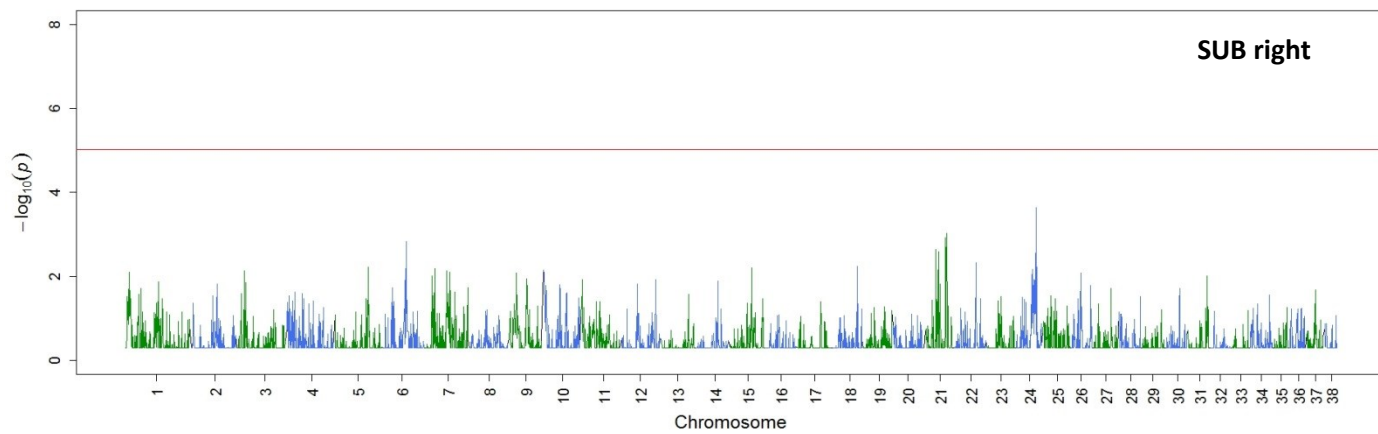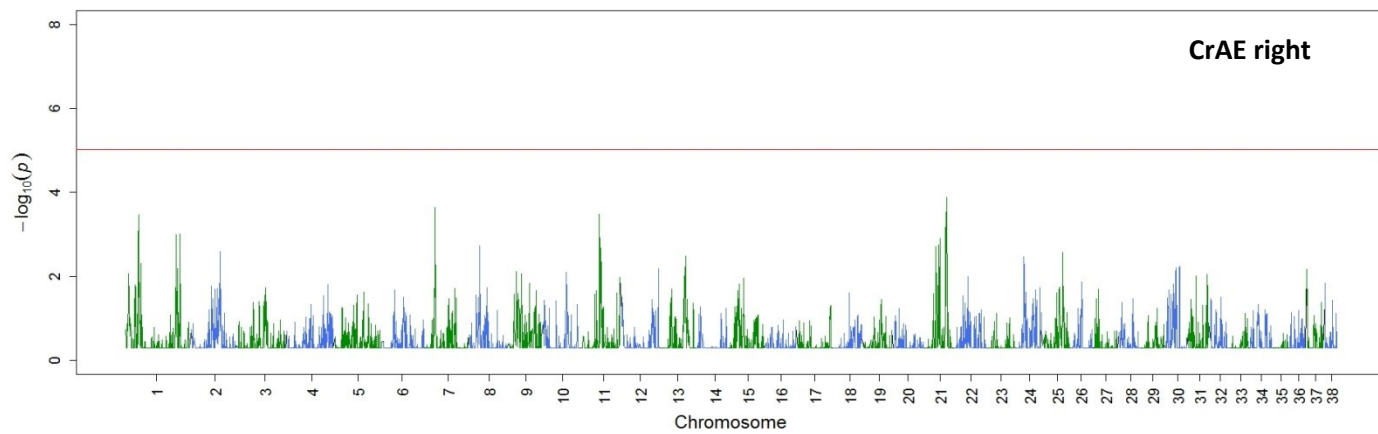

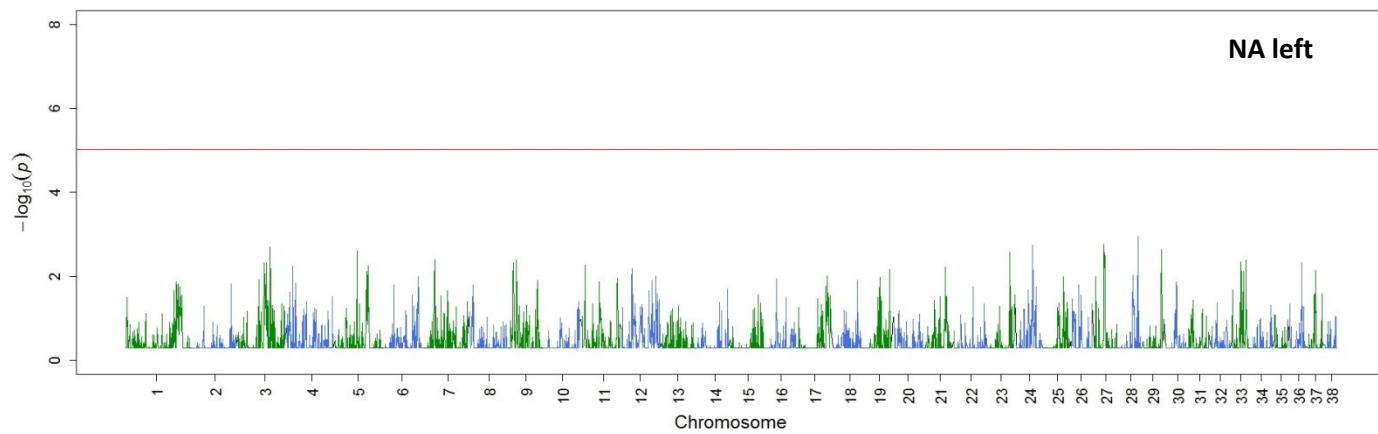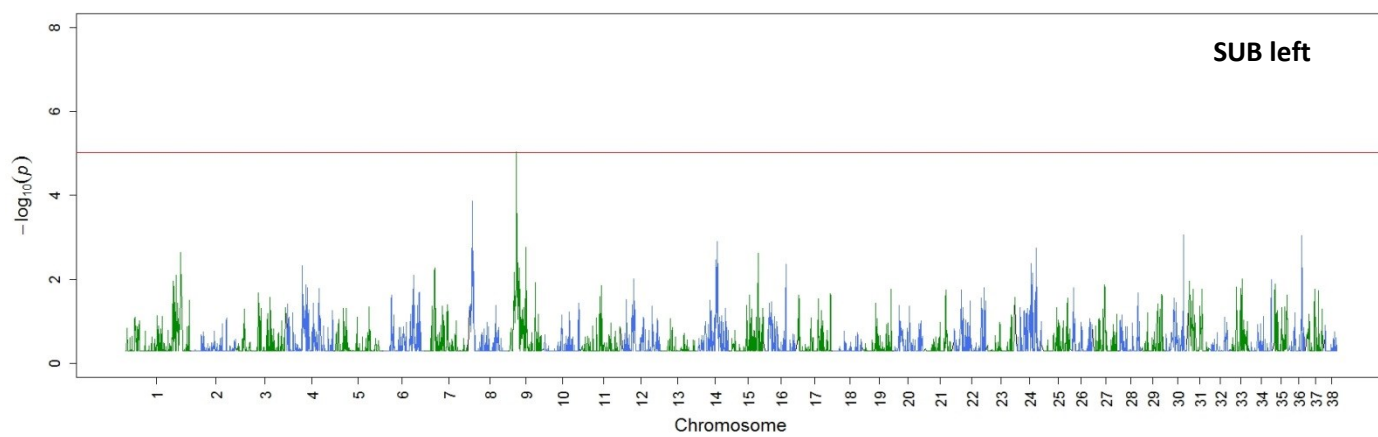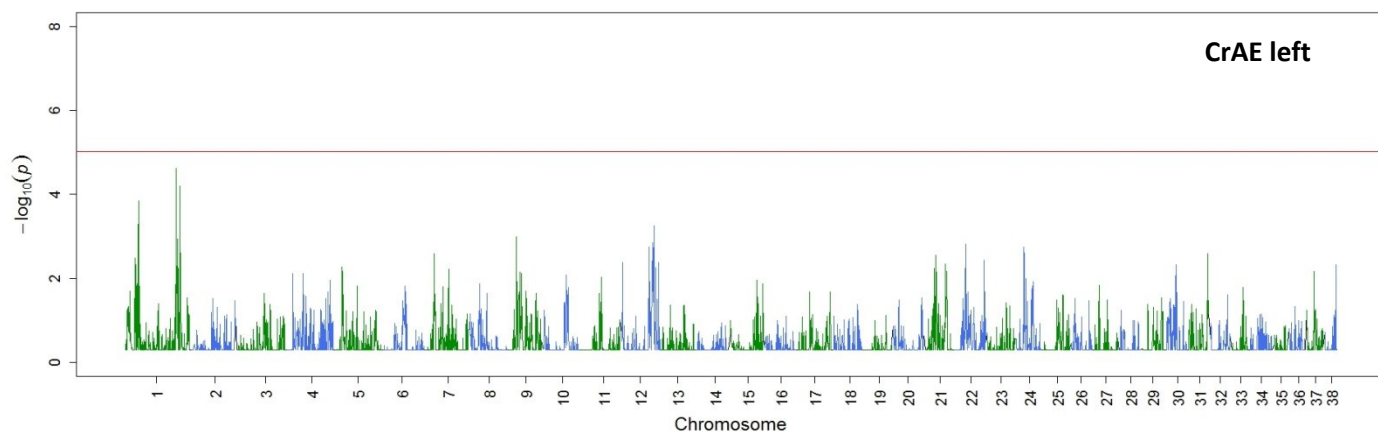

Supplement: 12864_2014_6512_MOESM6_ESM.pdf [file 12864_2014_6512_MOESM6_ESM.pdf]
